# Supplementary material
Source: HighWire-hosted journal article supplement (doi:10.1101/rna.078889.121)
Supplement: Supplemental_Figures_Tables_Legends.docx [file Supplemental_Figures_Tables_Legends.docx]

**Supplemental Tables:**

**Table S1.** List of RNA secondary structural motif - small molecule interactions extracted from PDB.

**Table S2.** List of small molecules derived from PDB.

**Supplemental Figures:**

**Fig S1.** Number of ligand-bound secondary structural motifs in RNALigands database: hairpin loops (n = 156), internal loops (n = 313), bulge loops (n = 176), and multi-branch loops (n = 80). The length of the loop is also indicated.

**Fig S2.** Examples of small molecules obtained by our ligand search pipeline as stored in RNALigands database.

**Fig S3.** Case study on SARS-CoV-2. The corresponding names and images

of the small molecules returned by our motif query pipeline are provided in

supplementary data Figure S2.
