# Supplementary material
Source: HighWire-hosted journal article supplement (doi:10.1101/rna.078889.121)
Supplement: Supplemental_Information.docx [file Supplemental_Information.docx]

**Table S1. List of RNA motif – small molecule interactions extracted from PDB.**

| **PDB Entry** | **Ligand name** | **Ligand class** | **RNA secondary motif** |
| --- | --- | --- | --- |
| 1am0_A | AMP | RNA APTAMER | Hairpin,Multi |
| 1arj_N | ARG | Trans-activation response element (TAR) (Pre-microRNA) | Bulge conformation changed |
| 1byj_A | GE1,GE2,GE3 | 16S ribosomal RNA | Intelnal |
| 1ddy_A | B12,NME | B12 RNA Aptamer | Internal |
| 1eht_A | TEP | Theophylline-binding RNA Aptamer | Bulge,Internal |
| 1ei2_A | NMY | TAU EXON 10 Splicing Regulatory Element (SRE) RNA (Pre-mRNA) | Hairpin,Bulge |
| 1f1t_A | ROS | malachite green aptamer | Bulge,Internal |
| 1f27_A | BTN | biotin-binding pseudoknot-containing aptamer | Hairpin |
| 1fmn_A | FMN | FMN-RNA aptamer | Internal |
| 1kod_B | CIR | RNA APTAMER | Hairpin |
| 1lvj_A | PMZ | HIV-1 Trans Activating Region RNA (TAR) | Bulge |
| 1nbk_A | GND | RNA aptamer | Bulge |
| 1nem_A | BDR,NEB | RNA aptamer | Hairpin |
| 1nta_A | SRY | RNA aptamer | Hairpin |
| 1q29_A | CO | A helical twist-induced conformational switch activates cleavage in the hammerhead ribozyme | Hairpin |
| 1raw_A | AMP | RNA aptamer | Hairpin,Multi |
| 1tob_A | TOA,TOB,TOC | RNA aptamer | Hairpin,Bulge |
| 1y26_X | ADE | Vibrio vulnificus A-riboswitch | Hairpin,Multi |
| 2au4_A | GTP | Class I RNA aptamer to GTP | Hairpin,Internal,Multi |
| 2cky_A | TPP | Eukaryotic Thiamine Pyrophosphate Riboswitch | Hairpin,Bulge,Internal,Multi |
| 2ees_A | HPA | Guanine riboswitch aptamer | Hairpin,Multi |
| 2eeu_A | HPA | Guanine riboswitch aptamer | Hairpin,Multi |
| 2hok_A | TPP | E. coli thi-box riboswitch | Hairpin,Internal,Multi |
| 2hoo_A | BFT | E. coli thi-box riboswitch | Hairpin,Internal,Multi |
| 2ktz_A | ISH | HCV IRES Domain IIa RNA | Hairpin,Multi |
| 2kxm_A | RIO | neomycin sensing riboswitch | Hairpin,Bulge |
| 2l1v_A | PRF | preQ1 riboswitch (Class I) aptamer | Hairpin,External |
| 2l94_A | L94 | HIV-1 frameshift site RNA | Bulge |
| 2lwk_A | 0EC | influenza A virus RNA promoter | Bulge |
| 2miy_A | PRF | preQ1 Class II riboswitch | Hairpin,External |
| 2qwy_A | SAM | SAM-II riboswitch | Bulge,Internal,External |
| 2tob_A | TOA,2TB,TOC | tobramycin-RNA aptamer | Hairpin,Internal |
| 2xo1_A | N6M | Guanine riboswitch | Hairpin,Multi |
| 2ygh_A | SAM | SAM-I RIBOSWITCH | Internal,Multi |
| 2yie_Z | FMN | FMN RIBOSWITCH | Internal,External |
| 3d0u_A | LYS | Lysine Riboswitch | Bulge,Multi |
| 3dig_X | SLZ | Lysine Riboswitch | Bulge,Multi |
| 3ds7_A | GNG | purine riboswitch | Hairpin,Multi |
| 3e5c_A | SAM | SMK box (SAM-III) Riboswitch | Bulge,Multi |
| 3f2q_X | FMN | FMN RIBOSWITCH | Hairpin,Bulge,Multi |
| 3fu2_B | PRF | PreQ1 riboswitch | Hairpin,External |
| 3gca_A | PQO | PreQ0 riboswitch | Hairpin,External |
| 3gx7_A | SAM | SAM-I Riboswitch | Bulge,Internal,Multi |
| 3k1v_A | PRF | PreQ1 riboswitch | Hairpin,External |
| 3la5_A | 5AZ | Adenosine RIboswitch | Hairpin,Multi |
| 3mij_A | R14 | telomeric RNA G-quadruplex | Hairpin,External |
| 3npn_A | SAH | S-ADENOSYLHOMOCYSTEINE RIBOSWITCH | Hairpin,Internal,Multi |
| 3npq_A | SAH | S-ADENOSYLHOMOCYSTEINE RIBOSWITCH | Hairpin,Internal,Multi |
| 3owi_A | GLY | Domain II of glycine riboswitch | Hairpin,Bulge,Internal,Multi |
| 3q3z_V | C2E | c-di-GMP-II riboswitch | Hairpin,Bulge |
| 3rkf_A | DX4 | Guanine riboswitch | Hairpin,Multi |
| 3sd3_A | FFO | Tetrahydrofolate riboswitch | Hairpin,Internal |
| 3ski_A | GNG | 2'- Deoxyguanosine riboswitch | Hairpin,Multi |
| 3suh_X | FFO | Riboswitch | Bulge,Internal |
| 4aob_A | SAM | SAM-I RIBOSWITCH | Internal,Multi |
| 4b5r_A | SAM | SAM-I RIBOSWITCH | Internal,Multi |
| 4fel_B | HPA | U25A/A46G mutant of the B. subtilis xpt-pbuX guanine riboswitch aptamer domain | Hairpin,Multi |
| 4frg_B | I2A | cobalamin riboswitch aptamer domain | Hairpin,Bulge,Multi |
| 4frn_A | I2A | Cobalamin riboswitch aptamer domain | Hairpin,Multi |
| 4gma_Z | B1Z | Adenosylcobalamin riboswitch | Hairpin,Multi |
| 4gxy_A | B1Z | Adenosylcobalamin riboswitch | Hairpin,Bulge,Internal,Multi |
| 4jf2_A | PRF | PreQ1-II Riboswitch | Hairpin,External |
| 4kqy_A | SAM | YitJ S box/SAM-I riboswitch | Hairpin,Internal,Multi |
| 4oqu_A | SAM | SAM-I/IV riboswitch | Hairpin,Internal,Multi |
| 4qk9_A | 2BA | C-di-AMP riboswitch | Hairpin,Bulge,Internal,Multi,External |
| 4qka_A | 2BA | C-di-AMP riboswitch | Hairpin,Bulge,Internal,Multi |
| 4qlm_A | 2BA | ydao riboswitch | Hairpin,Bulge,Internal,Multi,External |
| 4qln_A | 2BA | ydao riboswitch | Hairpin,Bulge,Internal,Multi,External |
| 4rum_A | CO | NiCo riboswitch RNA | Bulge,Internal,Multi |
| 4rzd_A | PRF | PreQ1-III Riboswitch (Class 3) | Multi,External |
| 4ts0_Y | 38E | Spinach RNA aptamer, bimolecular construct | Hairpin,External |
| 4tzx_X | ADE | Vibrio vulnificus Adenine Riboswitch | Hairpin,Multi |
| 4xw7_A | AMZ | pfl RNA | Hairpin,Bulge |
| 4y1i_A | GTP | Lactococcus lactis yybP-ykoY riboswitch | Hairpin,Bulge,Multi,External |
| 4y1m_B | GTP | E. coli yybP-ykoY riboswitch | External |
| 4yaz_R | 4BW | 3',3'-cGAMP riboswitch | Hairpin,Bulge,Internal,Multi |
| 4znp_A | AMZ | pfI Riboswitch | Hairpin,Internal |
| 4znp_B | AMZ | pfI Riboswitch | Hairpin,Internal |
| 5btp_B | AMZ | ZTP riboswitch | Hairpin,Internal |
| 5c7w_C | HPA | 5'-monophosphate Z:P guanine riboswitch | Hairpin,Internal,Multi |
| 5d5l_A | PRF | PreQ1-II riboswitch | Hairpin,External |
| 5kpy_A | 4PQ | 5-hydroxytryptophan RNA aptamer | Hairpin,Bulge,Internal,Multi |
| 5lwj_A | 11,GTP | GTP Class II RNA (34-MER) | Hairpin,Internal,Multi |
| 5nep_A | MGX | guanidine II riboswitch P1 stem-loop | Hairpin |
| 5ob3_A | 1TU | RNA aptamer (69-MER) | Hairpin,Bulge,Multi |
| 5v0o_A | 8OS | Nonenzymatic RNA Primer | External |
| 5v3f_A | 74G | RNA Mango Aptamer | Hairpin,Multi |
| 5vcf_A | 8OS | Nonenzymatic RNA Primer | Internal |
| 6c63_A | EKJ | Mango-II Fluorescent Aptamer | Hairpin,Multi |
| 6c65_C | EKJ | Mango-II-A22U Fluorescent Aptamer | Hairpin,Multi |
| 6cc3_A | GTP | ykoY-alx riboswitch | Hairpin,Bulge,Multi,External |
| 6cc3_B | GTP | ykoY-alx riboswitch | Hairpin,Bulge,External |
| 6ck4_A | G4P | PRPP riboswitch | Hairpin,Bulge,Internal,Multi,External |
| 6ck4_B | G4P | PRPP riboswitch | Internal,Multi |
| 6ck4_D | G4P | PRPP riboswitch | Internal,Multi |
| 6dlq_A | PRP | PRPP Riboswitch | Hairpin,Bulge,Multi,External |
| 6dmc_A | G4P | ppGpp Riboswitch | Bulge,Internal,Multi |
| 6e1t_A | HLV | class I PreQ1 riboswitch | Hairpin,External |
| 6e8s_A | EKJ | iMango-III aptamer | Hairpin,Bulge,Multi |
| 6e8t_C | HZG | Mango-III (A10U) aptamer | Hairpin,Bulge,Multi |
| 6e8u_B | HZD | Mango-III (A10U) aptamer | Hairpin,Bulge,Multi |
| 6fz0_A | SAM | metY SAM V (53-MER) | Bulge,External |
| 6gzk_A | FH8 | TMR3 (48-MER) | Bulge,Multi |
| 6hag_A | SAH | SAM Riboswitch | Hairpin,External |
| 6izp_A | B2R | RNA with UGGAA-UGGAA pentad | Internal |
| 6jjh_B | POH | two-quartet RNA parallel G-quadruplex | Hairpin,External |
| 6jji_B | POH | two-quartet RNA parallel G-quadruplex | Hairpin,External |
| 6n5q_A | 2BA | Human pir-miRNA-378a Apical Loop and One-base-pair Fused to the YdaO Riboswitch Scaffold | Hairpin,Bulge,Internal,Multi |
| 6p2h_A | GNG | 2'-dG-II class of riboswitche | Hairpin,Bulge,Multi |
| 6qn3_A | GLN | Glutamine II Riboswitch | Hairpin,Bulge,Internal,External |
| 6svs_A | GTP,CA,A23 | U•A-U-rich RNA triple helix with 11 consecutive base triples | Hairpin,External |
| 6uet_A | SAM | SAM-IV riboswitch | Internal,Multi |
| 6ugj_A | URA | tRNA(Asp) acceptor stem/T stem-loop | Bulge |

**Table S2. List of small molecules derived from PDB.**

| **PDB ID** | **Small molecule name** |
| --- | --- |
| ARG | ARGININE |
| AMP | ADENOSINE |
| GE1 | 3,4-DIDEOXY-2,6-AMINO-ALPHA-D |
| GE2 | 3,5-DIAMINO-CYCLOHEXANOL |
| GE3 | 5-METHYL-4-METHYLAMINO-TETRAHYDRO-PYRAN-2,3,5-TRIOL |
| B12 | COBALAMIN |
| NME | METHYLAMINE |
| TEP | THEOPHYLLINE |
| NMY | NEOMYCIN |
| CNC | CO-CYANOCOBALAMIN |
| ROS | N,N'-TETRAMETHYL-ROSAMINE |
| BTN | BIOTIN |
| FMN | FLAVIN |
| PAR | PAROMOMYCIN |
| CIR | CITRULLINE |
| PMZ | 1-[10-(3-DIMETHYLAMINO-PROPYL)-10H-PHENOTHIAZIN-2-YL]-ETHANONE |
| GND | 2-AMINO-5-GUANIDINO-PENTANOIC |
| BDR | BETA-D-RIBOFURANOSYL |
| IDG | O-2,6-DIAMINO-2,6-DIDEOXY-BETA-L-IDOPYRANOSE |
| BDG | O-2,6-DIAMINO-2,6-DIDEOXY-ALPHA-D-GLUCOPYRANOSE |
| NEB | 2-DEOXY-D-STREPTAMINE |
| SRY | STREPTOMYCIN |
| CO | COBALT |
| PA1 | 2-amino-2-deoxy-alpha-D-glucopyranose |
| CYY | 2-DEOXYSTREPTAMINE |
| MGR | MALACHITE |
| RIB | RIBOSE |
| TOA | 3-DEOXY-3-AMINO |
| TOC | 2,3,6-TRIDEOXY-2,6-DIAMINO |
| TOB | 1,3-DIAMINO-5,6-DIHYDROXYCYCLOHEXANE |
| P13 | N-[2-(3-AMINOPROPOXY)-5-(1H-INDOL-5-YL)BENZYL]-N-(2-PIPERAZIN-1-YLETHYL)AMINE |
| P14 | N-[2-(2-{[(4-{[AMINO(IMINO)METHYL]AMINO}BUTYL)AMINO]METHYL}-4-METHOXYPHENOXY)ETHYL]GUANIDINE |
| P12 | 4-[AMINO(IMINO)METHYL]-1-[2-(3-AMMONIOPROPOXY)-5-METHOXYBENZYL]PIPERAZIN-1-IUM |
| ADE | ADENINE |
| ZN | ZINC |
| GTP | GUANOSINE-5'-TRIPHOSPHATE |
| 6AP | 9H-PURINE-2,6-DIAMINE |
| TPP | THIAMINE |
| HPA | HYPOXANTHINE |
| XXX | "(2R,3S,4R,5R,6R)-6-((1R,2R,3S,4R,6S)-4,6-DIAMINO-2,3-DIHYDROXYCYCLOHEXYLOXY)-5-AMINO-2-(AMINOMETHYL)-TETRAHYDRO-2H-PYRAN-3,4-DIOL" |
| RIO | RIBOSTAMYCIN |
| LIV | LIV |
| 3AY | PYRIMIDINE-2,4,6-TRIAMINE |
| SAM | S-ADENOSYLMETHIONINE |
| CA | CALCIUM |
| TPS | THIAMIN |
| BFT | S-BENZOYLTHIAMINE |
| 218 | 1-[(4-AMINO-2-METHYLPYRIMIDIN-5-YL)METHYL]-3-(2-HYDROXYETHYL)-2-METHYLPYRIDINIUM |
| G0B | G0B |
| MIX | 1,4-DIHYDROXY-5,8-BIS({2-[(2-HYDROXYETHYL)AMINO]ETHYL}AMINO)-9,10-ANTHRACENEDIONE |
| ISH | (7R)-7-[(dimethylamino)methyl]-1-[3-(dimethylamino)propyl]-7,8-dihydro-1H-furo[3,2-e]benzimidazol-2-amine |
| ISI | (7S)-7-[(dimethylamino)methyl]-1-[3-(dimethylamino)propyl]-7,8-dihydro-1H-furo[3,2-e]benzimidazol-2-amine |
| PRF | 7-DEAZA-7-AMINOMETHYL-GUANINE |
| L8H | 4-methoxynaphthalen-2-amine |
| L94 | N'-{(Z)-amino[4-(amino{[3-(dimethylammonio)propyl]iminio}methyl)phenyl]methylidene}-N,N-dimethylpropane-1,3-diaminium |
| 0EC | 6,7-dimethoxy-2-(piperazin-1-yl)quinazolin-4-amine |
| AM2 | APRAMYCIN |
| 2TB | 1,3-DIAMINO-4,5,6-TRIHYDROXY-CYCLOHEXANE |
| ZZR | 3,6-diamino-1,5-dihydro[1,2,4]triazolo[4,3-b][1,2,4]triazol-4-ium |
| 3AW | 6-METHYL-1,3,5-TRIAZINE-2,4-DIAMINE |
| ZZS | 1,3,5-TRIAZINE-2,4-DIAMINE |
| N6M | N-METHYL-9H-PURIN-6-AMINE |
| LYS | LYSINE |
| PYI | 1-[(4-AMINO-2-METHYLPYRIMIDIN-5-YL)METHYL]-3-(2-{[HYDROXY(PHOSPHONOOXY)PHOSPHORYL]OXY}ETHYL)-2-METHYLPYRIDINIUM |
| D2X | 3-[(4-hydroxy-2-methylpyrimidin-5-yl)methyl]-5-(2-{[(R)-hydroxy(phosphonooxy)phosphoryl]oxy}ethyl)-4-methyl-1,3-thiazol-3-ium |
| SLZ | L-THIALYSINE |
| HRG | L-HOMOARGININE |
| IEL | N~6~-[(1Z)-ethanimidoyl]-L-lysine |
| OLZ | O-(2-aminoethyl)-L-serine |
| GNG | 2'-DEOXY-GUANOSINE |
| SAH | S-ADENOSYL-L-HOMOCYSTEINE |
| EEM | [(3S)-3-amino-4-hydroxy-4-oxo-butyl]-[[(2S,3S,4R,5R)-5-(6-aminopurin-9-yl)-3,4-dihydroxy-oxolan-2-yl]methyl]-methyl-selanium |
| RBF | RIBOFLAVIN |
| RS3 | 1-deoxy-1-[8-(dimethylamino)-7-methyl-2,4-dioxo-3,4-dihydrobenzo[g]pteridin-10(2H)-yl]-D-ribitol |
| 6GU | 6-chloroguanine |
| 6GO | 6-O-methylguanine |
| 2BP | 9H-purin-2-amine |
| XAN | XANTHINE |
| PQ0 | 2-AMINO-4-OXO-4,7-DIHYDRO-3H-PYRROLO[2,3-D]PYRIMIDINE-5-CARBONITRILE |
| A2F | 2-fluoroadenine |
| S9L | 2-[2-(2-HYDROXYETHOXY)ETHOXY]ETHYL |
| SFG | SINEFUNGIN |
| 5AZ | 6-amino-1,3,5-triazin-2(1H)-one |
| R14 | N,N'-[acridine-3,6-diylbis(1H-1,2,3-triazole-1,4-diylbenzene-3,1-diyl)]bis[3-(diethylamino)propanamide] |
| GLY | GLYCINE |
| C2E | "9,9'-[(2R,3R,3aS,5S,7aR,9R,10R,10aS,12S,14aR)-3,5,10,12-tetrahydroxy-5,12-dioxidooctahydro-2H,7H-difuro[3,2-d:3',2'-j][1,3,7,9,2,8]tetraoxadiphosphacyclododecine-2,9-diyl]bis(2-amino-1,9-dihydro-6H-purin-6-one)" |
| DX4 | 2-amino-1,9-dihydro-6H-purine-6-thione |
| FFO | N-[4-({[(6S)-2-amino-5-formyl-4-oxo-3,4,5,6,7,8-hexahydropteridin-6-yl]methyl}amino)benzoyl]-L-glutamic |
| GMP | GUANOSINE |
| DGP | 2'-DEOXYGUANOSINE-5'-MONOPHOSPHATE |
| 5GP | GUANOSINE-5'-MONOPHOSPHATE |
| THF | 5-HYDROXYMETHYLENE-6-HYDROFOLIC |
| ACA | 6-AMINOHEXANOIC |
| I2A | Hydroxocobalamin |
| B1Z | Adenosylcobalamin |
| 7DG | 7-DEAZAGUANINE |
| H4B | 5,6,7,8-TETRAHYDROBIOPTERIN |
| LYA | 2-{4-[2-(2-AMINO-4-OXO-4,7-DIHYDRO-3H-PYRROLO[2,3-D]PYRIMIDIN-5-YL)-ETHYL]-BENZOYLAMINO}-PENTANEDIOIC |
| 29G | pyrimido[4,5-d]pyrimidine-2,4-diamine |
| 29H | 2-aminopyrimido[4,5-d]pyrimidin-4(3H)-one |
| 2QB | 5-(azidomethyl)-2-methylpyrimidin-4-amine |
| 2QC | 1-[4-(1,2,3-thiadiazol-4-yl)phenyl]methanamine |
| SVN | "thieno[2,3-b]pyrazin-7-amine |
| VIB | 3-(4-AMINO-2-METHYL-PYRIMIDIN-5-YLMETHYL)-5-(2-HYDROXY-ETHYL)-4-METHYL-THIAZOL-3-IUM |
| 2BA | 2BA |
| CCC | CCC |
| 38E | (5Z)-5-(3,5-difluoro-4-hydroxybenzylidene)-2,3-dimethyl-3,5-dihydro-4H-imidazol-4-one |
| AMZ | AMINOIMIDAZOLE |
| 4BW | 4BW |
| GDP | GUANOSINE-5'-DIPHOSPHATE |
| 747 | (5Z)-5-[(3,5-difluoro-4-hydroxyphenyl)methylidene]-2-[(E)-(hydroxyimino)methyl]-3-methyl-3,5-dihydro-4H-imidazol-4-one |
| 51B | 2-[(3S)-1-{[2-(methylamino)pyrimidin-5-yl]methyl}piperidin-3-yl]-6-(thiophen-2-yl)pyrimidin-4(1H)-one |
| 4PQ | 5-hydroxy-L-tryptophan |
| 6YG | 2-[(3~{S})-1-[(2-methoxypyrimidin-5-yl)methyl]piperidin-3-yl]-6-thiophen-2-yl-1~{H}-pyrimidin-4-one |
| OHX | osmium |
| MGX | 1-METHYLGUANIDINE |
| AGU | AMINOGUANIDINE |
| AG2 | AGMATINE |
| EGD | N-ETHYLGUANIDINE |
| 1TU | 4-(3,5-difluoro-4-hydroxybenzyl)-1,2-dimethyl-1H-imidazol-5-ol |
| 8OS | 5'-O-[(S)-hydroxy(4-methyl-1H-imidazol-5-yl)phosphoryl]guanosine |
| 74G | 4-{[(2S)-3-{2,16-dioxo-20-[(3aS,4S,6aR)-2-oxohexahydro-1H-thieno[3,4-d]imidazol-4-yl]-6,9,12-trioxa-3,15-diazaicosan-1-yl}-2,3-dihydro-1,3-benzothiazol-2-yl]methyl}-1-methylquinolin-1-ium |
| GP3 | DIGUANOSINE-5'-TRIPHOSPHATE |
| DKM | 5-[(3S,4S)-3-(dimethylamino)-4-hydroxypyrrolidin-1-yl]-6-fluoro-4-methyl-8-oxo-3,4-dihydro-8H-1-thia-4,9b-diazacyclopenta[cd]phenalene-9-carboxylic |
| EKJ | 4-[(3-{2-[(2-methoxyethyl)amino]-2-oxoethyl}-1,3-benzothiazol-3-ium-2-yl)methyl]-1-methylquinolin-1-ium |
| EKM | 1-methyl-4-[(1E)-3-(3-methyl-1,3-benzothiazol-3-ium-2-yl)prop-1-en-1-yl]quinolin-1-ium" |
| G4P | "GUANOSINE-5',3'-TETRAPHOSPHATE |
| PRP | ALPHA-PHOSPHORIBOSYLPYROPHOSPHORIC |
| GZ7 | 10-(6-carboxyhexyl)-8-(cyclopentylamino)-2,4-dihydroxy-7-methylbenzo[g]pteridin-10-ium |
| GZG | 4-{benzyl[2-(7,8-dimethyl-2,4-dioxo-3,4-dihydrobenzo[g]pteridin-10(2H)-yl)ethyl]amino}butanoic |
| GZ4 | 7,8-dimethyl-2,4-dioxo-10-(3-phenylpropyl)-1,2,3,4-tetrahydrobenzo[g]pteridin-10-ium |
| HLV | 2-[(dibenzo[b,d]furan-2-yl)oxy]ethan-1-amine |
| HMJ | 2-[(dibenzo[b,d]furan-2-yl)oxy]-N,N-dimethylethan-1-amine |
| HMV | 2-[(9H-carbazol-3-yl)oxy]-N,N-dimethylethan-1-amine" |
| HNG | 2-amino-5-(aminomethyl)-1,7-dihydro-4H-pyrrolo[2,3-d]pyrimidin-4-one |
| TFX | 2-[4-(dimethylamino)phenyl]-3,6-dimethyl-1,3-benzothiazol-3-ium |
| J0D | 1-methyl-4-[(Z)-(3-methyl-1,3-benzothiazol-2(3H)-ylidene)methyl]quinolin-1-ium |
| HZG | 1-methyl-4-{[3-(2-oxopropyl)-1,3-benzothiazol-3-ium-2-yl]methyl}quinolin-1-ium |
| HZD | 4-[(3-{2,16-dioxo-20-[(3aR,4R,6aS)-2-oxohexahydro-1H-thieno[3,4-d]imidazol-4-yl]-6,9,12-trioxa-3,15-diazaicosan-1-yl}-1,3-benzothiazol-3-ium-2-yl)methyl]-1-methylquinolin-1-ium |
| FH8 | 5-carboxy |
| FXQ | 1-(4-carbamimidamidobutyl)guanidine |
| FXT | 1-(5-carbamimidamidopentyl)guanidine |
| B2R | 3-[3-[(7-methyl-1,8-naphthyridin-2-yl)carbamoyloxy]propylamino]propyl |
| POH | (1Z,4Z,9Z,15Z)-5,10,15,20-tetrakis(1-methylpyridin-1-ium-4-yl)-21,23-dihydroporphyrin |
| G | "GUANOSINE-5'-MONOPHOSPHATE |
| OXV | ~{N}-[2-[2-[2-[2-[2-[2-[(1-methylquinolin-4-yl)methyl]-1,3-benzothiazol-3-yl]ethanoylamino]ethoxy]ethoxy]ethoxy]ethyl]pentanamide |
| T0A | 5-deazatetrahydropterin |
| GLN | GLUTAMINE |
| A23 | A23 |
| URA | URACIL |

**Table S3. List of RNA and small molecules in benchmark test set.**

| 1ddy_C | B12 |
| --- | --- |
| 1ddy_E | B12 |
| 1ddy_G | B12 |
| 2cky_B | TPP |
| 2eet_A | HPA |
| 2fcy_A | NMY |
| 2fcy_B | NMY |
| 2fcz_A | RIO |
| 2fcz_B | RIO |
| 2fcz_C | RIO |
| 2fcz_D | RIO |
| 2gdi_X | TPP |
| 2gdi_Y | TPP |
| 2qwy_B | SAM |
| 2qwy_C | SAM |
| 3d2g_A | TPP |
| 3d2g_B | TPP |
| 3fu2_C | PRF |
| 3iwn_B | C2E |
| 3jcm_E | GTP |
| 3k0j_F | TPP |
| 3mxh_R | C2E |
| 3npq_B | SAH |
| 3npq_C | SAH |
| 3owi_B | GLY |
| 3oww_B | GLY |
| 3owz_B | GLY |
| 3oxe_B | GLY |
| 3oxj_B | GLY |
| 3oxm_B | GLY |
| 3q3z_A | C2E |
| 3v7e_D | SAM |
| 4fe5_B | HPA |
| 4fej_B | HPA |
| 4xwf_A | AMZ |
| 4y1j_A | GTP |
| 4y1j_B | GTP |
| 4yaz_A | 4BW |
| 4yb0_A | C2E |
| 5btp_A | AMZ |
| 5d5l_B | PRF |
| 5d5l_C | PRF |
| 5d5l_D | PRF |
| 5ddp_A | GLN |
| 5ddq_A | GLN |
| 5ddr_A | GLN |
| 5ddr_B | GLN |
| 5lyv_B | OHX |
| 5neq_A | AGU |
| 5v9z_A | 8OS |
| 6c63_B | EKJ |
| 6c63_C | EKJ |
| 6c65_B | EKJ |
| 6cb3_A | GTP |
| 6cb3_B | GTP |
| 6cc1_B | GTP |
| 6ck4_C | G4P |
| 6ck4_C | GTP |
| 6ck5_B | PRP |
| 6dmd_B | G4P |
| 6e1s_A | HLV |
| 6ff7_2 | GTP |
| 6jji_B | POH |
| 6las_A | SAM |
| 6las_B | SAM |
| 6lau_A | GTP |
| 6lau_A | SAH |
| 6lau_B | GTP |
| 6lau_B | SAH |
| 6lax_A | SAM |
| 6lax_B | SAM |
| 6n5k_A | 2BA |
| 6n5l_A | 2BA |
| 6n5n_A | 2BA |
| 6n5o_A | 2BA |
| 6n5p_A | 2BA |
| 6n5r_A | 2BA |
| 6n5s_A | 2BA |
| 6n5t_A | 2BA |
| 6od9_B | AMZ |
| 6qn3_B | GLN |
| 6tb7_A | AMP |
| 6vmy_A | B1Z |
| 6vui_A | PRF |
| 6vwt_A | ADE |
| 6vwt_B | ADE |
| 6vwv_A | ADE |
| 6vwv_B | ADE |
| 6yl5_A | SAH |
| 6yl5_C | SAH |
| 6yl5_E | SAH |
| 6yl5_G | SAH |
| 6yl5_I | SAH |
| 6yl5_K | SAH |
| 6ylb_A | SAM |
| 6ylb_C | SAM |
| 6ylb_F | SAM |
| 6ylb_I | SAM |
| 6ylb_M | SAM |
| 6ylb_O | SAM |
| 6ymi_A | AMP |
| 6ymi_C | AMP |
| 6ymi_F | AMP |
| 6ymi_I | AMP |
| 6ymi_M | AMP |
| 6ymi_O | AMP |
| 6yml_A | AMP |
| 6yml_C | AMP |
| 6ymm_A | SAM |
| 6ymm_C | SAM |
| 7d7v_A | GTP |
| 7d7w_A | GTP |
| 7d7x_A | GTP |
| 7d7y_A | GTP |
| 7d7z_A | GTP |

**Fig S1.** Number of ligand-bound secondary structural motifs in RNALigands database: hairpin loops (n = 156), internal loops (n = 313), bulge loops (n = 176), and multi-branch loops (n = 80). The length of the loop is also indicated.

**Fig S2.** Examples of small molecules obtained by our motif search pipeline as stored in RNALigands database. (1) ﻿Flavin mononucleotide (FMN), (2) Guanosine-5',3'-tetraphosphate (G4P), (3) Glycine (GLY), (4) 3-deoxy-4-C-methyl-3-(methylamino)-beta-L-arabinopyranose (GE3), (5) 2-amino-5-guanidino-pentanoic acid (GND), (6) 3-ammonio-3-deoxy-alpha-D-glucopyranose (TOA), (7) Hypoxanthine (HPA), (8) Neomycin (NMY), (9) Aminoimidazole 4-carboxamide ribonucleotide (ZMA), (10) Ribostamycin (RIO), (11) 5-hydroxy-L-tryptophan (HRP), (12) N-[4-({[(6S)-2-amino-5-formyl-4-oxo-3,4,5,6,7,8-hexahydropteridin-6-yl]methyl}amino)benzoyl]-L-glutamic acid (FFO), (13) S-adenosylmethionine (SAM) , (14) (2R,3R,3aS,5R,7aR,9R,10R,10aS,12R,14aR)-2,9-bis(6-amino-9H-purin-9-yl)octahydro-2H,7H-difuro[3,2-d:3',2'-j][1,3,7,9,2,8] tetraoxadiphosphacyclododecine-3,5,10,12-tetrol 5,12-dioxide (2BA)

**Fig S3.** Examples of application on SARS-CoV-2. The corresponding names and images

of the small molecules returned by our motif query pipeline are provided in

supplementary data Figure S2.
